# Supplementary material for: Topoisomerase VI senses and exploits both DNA crossings and bends to facilitate strand passage
Source: eLife journal article supplement (doi:10.7554/elife.31724), 2018-03-29
Supplement: supp [file elife-31724-supp-v1.zip]

Archive with 27 entries (27 files):
- elife_poa_e31724_Figure_1_source_data_1.docx
- elife_poa_e31724_Figure_7_figure_supplement_1.ai
- elife_poa_e31724_Transparent_Reporting_File.pdf
- elife_poa_e31724_Figure_5_source_data_3.xlsx
- elife_poa_e31724_Figure_8_figure_supplement_1.pdf
- elife_poa_e31724_Figure_2_source_data_2.xlsx
- elife_poa_e31724_Figure_1_source_data_2.docx
- elife_poa_e31724_Figure_6_source_data_1.docx
- elife_poa_e31724_Figure_4_figure_supplement_2.ai
- elife_poa_e31724_Figure_6_figure_supplement_1.ai
- elife_poa_e31724_Figure_2_figure_supplement_3.ai
- elife_poa_e31724_Figure_4_figure_supplement_1.pdf
- elife_poa_e31724_Figure_7_source_data_1.xlsx
- elife_poa_e31724_Figure_2_source_data_1.docx
- elife_poa_e31724_Figure_3_figure_supplement_1.ai
- elife_poa_e31724_Figure_2_figure_supplement_1.ai
- elife_poa_e31724_Figure_4_source_data_1.docx
- elife_poa_e31724_Figure_4_source_data_2.xlsx
- elife_poa_e31724_Figure_5_source_data_1.docx
- elife_poa_e31724_Figure_1_source_data_3.xlsx
- elife_poa_e31724_Figure_7_figure_supplement_2.ai
- elife_poa_e31724_Figure_5_source_data_2.docx
- elife_poa_e31724_Figure_2_figure_supplement_2.ai
- elife_poa_e31724_Figure_1_figure_supplement_1.ai
- elife_poa_e31724_Figure_5_figure_supplement_1.ai
- elife_poa_e31724_Figure_6_source_data_2.xlsx
- elife_poa_e31724_Figure_3_figure_supplement_2.ai
