# Supplementary material for: Topoisomerase VI senses and exploits both DNA crossings and bends to facilitate strand passage
Source: eLife journal article supplement (doi:10.7554/elife.31724), 2018-03-29
Supplement: supp [file elife-31724-supp-v1.zip › elife_poa_e31724_Figure_1_source_data_3.xlsx]

## Sheet: Sheet1
Numerical Data for Figure 1
Figure 1A
	20 bp duplex			30 bp duplex			40 bp duplex			60 bp duplex			70 bp duplex
topo VI [nM]	mean (ΔmA)	SD (mA)	N	mean (ΔmA)	SD (mA)	N	mean (ΔmA)	SD (mA)	N	mean (ΔmA)	SD (mA)	N	mean (ΔmA)	SD (mA)	N
0	0	0.7	3	0	0.4	3	0	0.6	3	0	0.5	3	0	1.3	3
3.90625	2.8	0.4	3	10.6	1.1	3	6.3	1.8	3	8.6	0.2	3	8	1.2	3
7.8125	4	1.7	3	16.8	0.4	3	13.7	1.2	3	20.3	2.2	3	15.4	3	3
15.625	6.1	1.7	3	30.1	1.1	3	26.6	0.8	3	37.1	4	3	31.6	10.4	3
31.25	10.6	0.8	3	46.2	1.1	3	51.6	1.6	3	80.2	5.4	3	49.7	8.9	3
62.5	17.4	2	3	63.8	1.3	3	75.9	0.9	3	107.5	3	3	91	6.5	3
125	35.5	3	3	88.3	1.8	3	98.9	2	3	130.5	5.3	3	113.5	6.6	3
250	64.3	2.8	3	111.4	2.7	3	120.4	1.4	3	158.9	4.9	3	132.7	13.3	3
500	102.4	2.4	3	130.7	4.3	3	127.6	4.7	3	170.8	6.9	3	154.9	4.4	3
1000	127.8	1.3	3	145.5	5.6	3	131.1	11.3	3	180	3.1	3	166.2	3.8	3
2000	150.3	1.3	3	158.8	3.1	3	144	1.2	3	182.8	1.7	3	173.4	3.3	3
4000	160.3	2.9	3	161.9	5.3	3	148.1	2.7	3	184	0.9	3	181.3	2.6	3
Figure 1B
	2.9 kb supercoiled plasmid DNA			sheared salmon sperm DNA
M basepairs DNA	mean (ΔmA)	SD (mA)	N	mean (ΔmA)	SD (mA)	N
0	74.4	2.4	3	76.6	2.4	3
0.104	75.8	4.7	3	79.1	1	3
0.208	77.4	1.9	3	79.4	2	3
0.416	72.5	2.3	3	79	0.8	3
0.832	65.2	2.3	3	74.4	1.5	3
1.664	53.9	3.3	3	69.6	1.9	3
3.328	23.9	0.6	3	60.3	1.2	3
6.656	1.9	1.1	3	45.4	2.1	3
13.312	-0.5	0.8	3	25.7	1.7	3
26.624	-0.2	0.2	3	12.2	0.5	3
53.248	-0.8	0.6	3	5	0.7	3
106.496	-1.5	0.5	3	0.4	0.7	3
