# Supplementary material for: Topoisomerase VI senses and exploits both DNA crossings and bends to facilitate strand passage
Source: eLife journal article supplement (doi:10.7554/elife.31724), 2018-03-29
Supplement: supp [file elife-31724-supp-v1.zip › elife_poa_e31724_Figure_2_source_data_2.xlsx]

## Sheet: Sheet1
Numerical Data for Figure 2
Figure 2A
Wild-type topo VI ATP consumption corrected using an ATPase-deficient Top6B-E44A control
	apoenzyme			400 μM bp sheared salmon-sperm DNA			400 μM bp 2.9 kb supercoiled plasmid DNA
mM ATP	Mean(ATP/enzyme/min)	SEM (ATP/enzyme/min)		Mean (ATP/enzyme/min)	SEM (ATP/enzyme/min)		Mean (ATP/enzyme/min)	SEM (ATP/enzyme/min)
0	0	0.054845		0	0.0593294		0	0.0557133
0.0625	0.016	0.0532165		0.168	0.0428952		0.744	0.0373095
0.125	-0.064	0.136763		0.06	0.144444		0.78	0.130292
0.25	0.02	0.0496388		0.472	0.0265332		1.356	0.0265332
0.5	-0.032	0.0154919		0.568	0.032		1.836	0.0489898
1	-0.008	0.0299332		0.716	0.0633719		2.32	0.0555697
2	-0.008	0.0536656		0.804	0.0672904		2.368	0.105376
4	0.104	0.0632454		0.952	0.0787907		2.4	0.0957496
Raw wild-type topo VI ATP consumption
	apoenzyme			400 μM bp sheared salmon-sperm DNA			400 μM bp 2.9 kb supercoiled plasmid DNA
mM ATP	Mean(ATP/enzyme/min)	SD (ATP/enzyme/min)	N	Mean (ATP/enzyme/min)	SD (ATP/enzyme/min)	N	Mean (ATP/enzyme/min)	SD (ATP/enzyme/min)	N
0	0	0.0183303	3	0	0.0432666	3	0	0.02498	3
0.0625	0.02	0.0668132	3	0.172	0.0385746	3	0.748	0.012	3
0.125	0.1	0.0733212	3	0.224	0.108885	3	0.944	0.0138564	3
0.25	0.104	0.07494	3	0.556	0.0183303	3	1.44	0.0183303	3
0.5	0.14	0.024	3	0.74	0.054111	3	2.008	0.084	3
1	0.232	0.04996	3	0.956	0.108885	3	2.56	0.095247	3
2	0.284	0.0207846	3	1.096	0.0733212	3	2.66	0.158442	3
4	0.408	0.02498	3	1.256	0.0851352	3	2.704	0.126996	3
Figure 2-Figure Supplement 1A
ATPase-deficient Top6B-E44A 'basal' ATP consumtion
	E44A, apoenzyme
mM ATP	Mean(ATP/enzyme/min)	SD (ATP/enzyme/min)	N
0	0	0.093209	3
0.0625	0.004	0.063498	3
0.125	0.164	0.225247	3
0.25	0.084	0.042143	3
0.5	0.172	0.012	3
1	0.24	0.013856	3
2	0.292	0.090598	3
4	0.304	0.106658	3
Figure 2-Figure Supplement 1B
Stimulation above basal ATP hydrolysis rate for ATPase-deficient Top6B-E44A
	linear sheared salmon-sperm DNA			2.9 kb supercoiled plasmid DNA
μM bp DNA	mean (ATP/enzyme/min)	SD (ATP/enzyme/min)	N	mean (ATP/enzyme/min)	SD (ATP/enzyme/min)	N
0	0	0.030199	3	0	0.052307	3
3.125	-0.032	0.024	3	-0.004	0.048497	3
6.25	0.056	0.054111	3	-0.004	0.038575	3
12.5	-0.028	0.048497	3	-0.008	0.045431	3
25	-0.028	0.038575	3	0.032	0.036661	3
50	-0.032	0.043267	3	-0.008	0.013856	3
100	-0.008	0.043267	3	0.008	0.027713	3
200	0.036	0.030199	3	0.024	0.031749	3
400	-0.032	0.052307	3	-0.012	0.048	3
800	-0.016	0.042143	3	0.068	0.045431	3
Data for stimulation above basal ATPhydrolysis rate for wildtype reported in Figure 4-Source Data 1
Figure 2B
	apoenzyme	100 μM bp sheared salmon sperm DNA	100 μM bp 2.9 kb supercoiled plasmid DNA
time(min)	ratiometric FRET	ratiometric FRET	ratiometric FRET
0	0.451045	0.492602	0.527843
0.5	0.471916	0.505105	0.565622
5	0.475324	0.534133	0.619247
10	0.476602	0.546071	0.629016
15	0.479181	0.556187	0.632969
20	0.478243	0.565352	0.634423
25	0.48094	0.577561	0.636166
30	0.486235	0.581042	0.636899
45	0.491148	0.591842	0.639047
60	0.495302	0.597757	0.640715
75	0.499667	0.600132	0.641784
90	0.502379	0.600132	0.642965
105	0.505273	0.606734	0.643437
120	0.508417	0.606659	0.64486
