# Supplementary material for: Topoisomerase VI senses and exploits both DNA crossings and bends to facilitate strand passage
Source: eLife journal article supplement (doi:10.7554/elife.31724), 2018-03-29
Supplement: supp [file elife-31724-supp-v1.zip › elife_poa_e31724_Figure_4_source_data_2.xlsx]

## Sheet: Sheet1
Numerical Data for Figure 4
Figure 4B	Stimulation above basal ATP hydrolysis rate								Figure 4-Figure Supplement 3	Basal ATP hydrolysis rate of functional mutants
	topo VI									topo VI
	linear sheared salmon-sperm DNA			2.9 kb supercoiled plasmid DNA					mM ATP	mean (ATP/enzyme/min)	SD (ATP/enzyme/min)	N
μM bp DNA	mean (ATP/enzyme/min)	SD (ATP/enzyme/min)	N	mean (ATP/enzyme/min)	SD (ATP/enzyme/min)	N			0	0	0.0183303	3
0	0	0.0169706	3	0	0.0884534	3			0.0625	0.02	0.0668132	3
3.125	0.044	0.0454313	3	0.376	0.084	3			0.125	0.1	0.0733212	3
6.25	0.128	0.107555	3	0.6	0.0183303	3			0.25	0.104	0.07494	3
12.5	0.156	0.048	3	0.824	0.0138564	3			0.5	0.14	0.024	3
25	0.324	0.0415692	3	1.084	0.06	3			1	0.232	0.04996	3
50	0.558	0.059397	3	1.332	0.02498	3			2	0.284	0.0207846	3
100	0.66	0.031749	3	1.556	0.0421426	3			4	0.408	0.02498	3
200	0.788	0.0603987	3	1.932	0.151947	3
400	1	0.0591946	3	2.528	0.11342	3
800	1.036	0.0703136	3	3.136	0.07494	3
	KGRR-AAA									KGRR-AAA
	linear sheared salmon-sperm DNA			2.9 kb supercoiled plasmid DNA					mM ATP	mean (ATP/enzyme/min)	SD (ATP/enzyme/min)	N
μM bp DNA	mean (ATP/enzyme/min)	SD (ATP/enzyme/min)	N	mean (ATP/enzyme/min)	SD (ATP/enzyme/min)	N			0	0	0.02498	3
0	0	0.0831384	3	0	0.02498	3			0.0625	0.048	0.01833	3
3.125	0.036	0.103923	3	0.292	0.0554256	3			0.125	0.084	0.006928	3
6.25	0.064	0.12943	3	0.44	0.012	3			0.25	0.128	0.013856	3
12.5	0.052	0.11655	3	0.632	0.024	3			0.5	0.2	0.01833	3
25	0.12	0.198272	3	1.024	0.0366606	3			1	0.244	0.052307	3
50	0.196	0.180533	3	1.796	0.145492	3			2	0.424	0.031749	3
100	0.208	0.204118	3	3	0.09992	3			4	0.576	0.045431	3
200	0.216	0.18629	3	4.444	0.201276	3
400	0.208	0.211395	3	5.536	0.107555	3
800	0.188	0.146642	3	6.176	0.090598	3
	KGRR-EEE									KGRR-EEE
	linear sheared salmon-sperm DNA			2.9 kb supercoiled plasmid DNA					mM ATP	mean (ATP/enzyme/min)	SD (ATP/enzyme/min)	N
μM bp DNA	mean (ATP/enzyme/min)	SD (ATP/enzyme/min)	N	mean (ATP/enzyme/min)	SD (ATP/enzyme/min)	N			0	0	0.038575	3
0	0	0.140627	3	0	0.0668132	3			0.0625	0.064	0.070314	3
3.125	-0.036	0.140627	3	0.08	0.0277128	3			0.125	0.104	0.043267	3
6.25	0.028	0.142155	3	0.216	0.0415692	3			0.25	0.092	0.043267	3
12.5	0.028	0.104843	3	0.408	0.156	3			0.5	0.256	0.1202	3
25	0.044	0.0865332	3	0.604	0.0138564	3			1	0.3	0.04996	3
50	0.044	0.108	3	1.148	0.02498	3			2	0.464	0.043267	3
100	0.044	0.07494	3	2.1	0.063498	3			4	0.58	0.030199	3
200	0.068	0.0831384	3	3.224	0.140627	3
400	0.032	0.0729932	3	3.908	0.151947	3
800	0.128	0.132	3	4.576	0.161146	3
	Salk/WKxY-AAA									Salk/WKxY-AAA
	linear sheared salmon-sperm DNA			2.9 kb supercoiled plasmid DNA					mM ATP	mean (ATP/enzyme/min)	SD (ATP/enzyme/min)	N
μM bp DNA	mean (ATP/enzyme/min)	SD (ATP/enzyme/min)	N	mean (ATP/enzyme/min)	SD (ATP/enzyme/min)	N			0	0	0.042143	3
0	0	0.166709	3	0	0.0567098	3			0.0625	0.108	0.027713	3
3.125	-0.02	0.0969948	3	0.028	0.0366606	3			0.125	0.108	0.013856	3
6.25	0	0.0432666	3	-0.036	0.0183303	3			0.25	0.136	0.063498	3
12.5	0.008	0.0484974	3	0.002	0.00848528	3			0.5	0.148	0.066813	3
25	0.008	0.0682349	3	0.04	0.0183303	3			1	0.2	0.02498	3
50	-0.004	0.0301993	3	0.088	0.0421426	3			2	0.316	0.041569	3
100	0	0.0432666	3	0.136	0.0660908	3			4	0.452	0.01833	3
200	0	0.0207846	3	0.172	0.0277128	3
400	0.012	0.012	3	0.244	0.0385746	3
800	0.14	0.161146	3	0.284	0.031749	3
	Salk/WKxY-EEE									Salk/WKxY-EEE
	linear sheared salmon-sperm DNA			2.9 kb supercoiled plasmid DNA					mM ATP	mean (ATP/enzyme/min)	SD (ATP/enzyme/min)	N
μM bp DNA	mean (ATP/enzyme/min)	SD (ATP/enzyme/min)	N	mean (ATP/enzyme/min)	SD (ATP/enzyme/min)	N			0	0	0.038575	3
0	0	0.0210713	3	0	0.0207846	3			0.0625	0.044	0.139083	3
3.125	0.044	0.0523068	3	-0.048	0.0549909	3			0.125	0.14	0.036661	3
6.25	0.028	0.00916515	3	0.072	0.141478	3			0.25	0.136	0.031749	3
12.5	0.016	0.0034641	3	0.16	0.246024	3			0.5	0.312	0.048497	3
25	0.052	0.0192873	3	-0.04	0.02498	3			1	0.384	0.042143	3
50	0.028	0.0192873	3	-0.04	0.0421426	3			2	0.516	0.01833	3
100	0.032	0.0103923	3	-0.036	0.031749	3			4	0.72	0.162923	3
200	0	0.0301993	3	0.008	0.0069282	3
400	0.088	0.0591946	3	0.148	0.0884534	3
800	0.036	0.0034641	3	0.216	0.0207846	3
	H2TH-AAA									H2TH-AAA
	linear sheared salmon-sperm DNA			2.9 kb supercoiled plasmid DNA					mM ATP	mean (ATP/enzyme/min)	SD (ATP/enzyme/min)	N
μM bp DNA	mean (ATP/enzyme/min)	SD (ATP/enzyme/min)	N	mean (ATP/enzyme/min)	SD (ATP/enzyme/min)	N			0	0	0.006928	3
0	0	0.0277128	3	0	7.45058e-09	3			0.0625	0.14	0.078689	3
3.125	-0.036	0.0798999	3	0.38	0.0183303	3			0.125	0.156	0.048497	3
6.25	0.088	0.0523068	3	0.684	0.0207846	3			0.25	0.152	0.012	3
12.5	0.188	0.0554256	3	1.216	0.0421426	3			0.5	0.248	0.020785	3
25	0.276	0.0183303	3	1.456	0.0366606	3			1	0.344	0.043267	3
50	0.592	0.0432666	3	1.784	0.134878	3			2	0.496	0.068235	3
100	0.756	0.0615792	3	1.988	0.172372	3			4	0.664	0.036661	3
200	0.836	0.02498	3	2.356	0.123158	3
400	0.984	0.02498	3	2.66	0.0069282	3
800	1.016	0.0678823	3	2.972	0.0969948	3
	H2TH-EEE									H2TH-EEE
	linear sheared salmon-sperm DNA			2.9 kb supercoiled plasmid DNA					mM ATP	mean (ATP/enzyme/min)	SD (ATP/enzyme/min)	N
μM bp DNA	mean (ATP/enzyme/min)	SD (ATP/enzyme/min)	N	mean (ATP/enzyme/min)	SD (ATP/enzyme/min)	N			0	0	0.0799	3
0	0	0.012	3	0	0.0069282	3			0.0625	-0.02	0.036	3
3.125	0.096	0.0207846	3	0.428	0.04996	3			0.125	0.052	0.024	3
6.25	0.104	0.02498	3	0.78	0.04996	3			0.25	0.152	0.054111	3
12.5	0.216	0.0523068	3	1.244	0.0567098	3			0.5	0.152	0.060399	3
25	0.264	1.05367e-08	3	1.52	0.0660908	3			1	0.26	0.05671	3
50	0.46	0.034641	3	1.696	0.072	3			2	0.424	0.020785	3
100	0.68	0.0932094	3	1.896	0.0554256	3			4	0.62	0.036661	3
200	0.74	0.04996	3	1.964	0.0615792	3
400	0.884	0.0969948	3	2.224	0.114473	3
800	0.984	0.101823	3	2.604	0.107555	3
