# Supplementary material for: Topoisomerase VI senses and exploits both DNA crossings and bends to facilitate strand passage
Source: eLife journal article supplement (doi:10.7554/elife.31724), 2018-03-29
Supplement: supp [file elife-31724-supp-v1.zip › elife_poa_e31724_Figure_5_source_data_3.xlsx]

## Sheet: Sheet1
Numerical Data for Figure 5
Figure 5A
	30 bp duplex			40 bp duplex			60 bp duplex			70 bp duplex
KGRR-AAA[nM]	mean (ΔmA)	SD (mA)	N	mean (ΔmA)	SD (mA)	N	mean (ΔmA)	SD (mA)	N	mean (ΔmA)	SD (mA)	N
0	0	1.2	3	0	1.1	3	0	1	3	0	0.9	3
3.90625	11.2	2	3	6.3	1.4	3	6.9	1.3	3	4.2	1.5	3
7.8125	17.1	1.4	3	10.7	2.1	3	10.2	1.4	3	6.3	0.9	3
15.625	29.1	2.2	3	17.2	1.7	3	18.2	1.5	3	13.1	1.6	3
31.25	42.7	2.2	3	38.3	1.5	3	35.8	3.2	3	27.4	2.1	3
62.5	60.1	0.4	3	73.7	3.9	3	66.5	2.7	3	54.3	4.2	3
125	79.3	1	3	113.35	3.5	3	94.7	2.6	3	95.2	5.4	3
250	98.7	1	3	125.65	0.2	3	124.2	0.6	3	136.9	2.6	3
500	117.2	1.2	3	135.55	2.6	3	145.8	1.5	3	159.3	0.9	3
1000	128.5	4.1	3	145.15	0.9	3	160.6	1.6	3	174.1	1.3	3
2000	133.1	7.1	3	155.5	0.7	3	168.9	1.6	3	182.3	1.5	3
4000	133.4	3.9	3	158.6	2.3	3	172.2	0.6	3	183	3	3
KGRR-EEE[nM]	mean (ΔmA)	SD (mA)	N	mean (ΔmA)	SD (mA)	N	mean (ΔmA)	SD (mA)	N	mean (ΔmA)	SD (mA)	N
0	0	0.7	3	0	1.2	3	0	1.2	3	0	1.1	3
3.90625	9.8	1.4	3	4.4	1.1	3	5.9	0.9	3	2.9	0.7	3
7.8125	17.2	1.7	3	7.9	1.5	3	9.7	1.4	3	6.2	0.8	3
15.625	26.5	2	3	14.8	0.7	3	15.1	1.1	3	11.2	1.2	3
31.25	39.8	2.1	3	30.2	0.5	3	30.5	0.1	3	21.8	1.6	3
62.5	55.8	0.7	3	58.7	4.7	3	54.2	0.9	3	38.4	2.7	3
125	72.8	0.5	3	97.4	0.3	3	81.3	3	3	62	3.1	3
250	89.9	1.1	3	110.5	1.2	3	109.5	1	3	89.7	3.4	3
500	106.5	3.9	3	121.4	1	3	131.7	1.7	3	118.6	2.4	3
1000	122.9	2	3	129.4	1.2	3	145.9	0.4	3	137.8	1.7	3
2000	132.4	2.4	3	138.3	1.4	3	155.3	6.7	3	152.3	2.1	3
4000	135.4	2.2	3	142.7	0.3	3	161.6	6.3	3	155	2.7	3
Stalk/WKxY-AAA[nM]	mean (ΔmA)	SD (mA)	N	mean (ΔmA)	SD (mA)	N	mean (ΔmA)	SD (mA)	N	mean (ΔmA)	SD (mA)	N
0	0	0.3	3	0	0.9	3	0	0.5	3	0	0.4	3
3.90625	2.3	0.9	3	2.1	0.6	3	0.8	0.6	3	1.6	0.8	3
7.8125	3.4	1	3	2.5	0.6	3	1	0.3	3	1.8	1.5	3
15.625	6.5	1.5	3	3.8	0.9	3	0.5	1	3	3.1	1	3
31.25	12	1.3	3	5.8	0.7	3	1.3	1.7	3	4.4	0.9	3
62.5	20.2	1.5	3	10.5	0.5	3	3	0.9	3	6.1	1	3
125	28.9	0.7	3	25.9	0.4	3	11.2	4.4	3	17	1	3
250	35.4	0.9	3	62.6	1	3	23.6	1	3	44.6	1.5	3
500	43.5	1	3	88.4	0.4	3	44.9	1	3	72.3	1.4	3
1000	52	3.2	3	99.3	0.4	3	67.8	0.6	3	91	3.1	3
2000	58	2.5	3	101.8	2.6	3	85.6	1.3	3	100.4	13.9	3
4000	62.9	1.4	3	97.1	3	3	97.3	0.2	3	121.4	1.2	3
Stalk/WKxY-EEE[nM]	mean (ΔmA)	SD (mA)	N	mean (ΔmA)	SD (mA)	N	mean (ΔmA)	SD (mA)	N	mean (ΔmA)	SD (mA)	N
0	0	1.5	3	0	0.03	3	0	0.5	3	0	1.2	3
3.90625	1.1	1.7	3	1.8	0.4	3	1.2	0.03	3	1.2	1.3	3
7.8125	2.4	0.7	3	2.4	0.4	3	0.8	0.1	3	1.6	1.4	3
15.625	3.5	0.5	3	1.8	0.6	3	0.9	0.5	3	1.2	1.5	3
31.25	6	0.3	3	2	0.6	3	-0.3	0.5	3	1.2	1	3
62.5	9.6	0.3	3	3.5	1	3	-0.7	0.7	3	1.1	0.9	3
125	14	1	3	8.5	0.4	3	0	0.6	3	0.8	0.7	3
250	18.6	2.1	3	21.4	0.5	3	3.8	0.1	3	1.3	0.8	3
500	24	1.3	3	39.8	0.8	3	12.2	0.4	3	3.2	0.2	3
1000	29.5	1.4	3	56.3	4.2	3	28.6	1.4	3	8.4	1.5	3
2000	23.9	10.4	3	73.8	1.3	3	48.2	1.1	3	20.7	0.2	3
4000	38.8	4.5	3	78.7	9	3	57.1	6.3	3	45.1	7.3	3
H2TH-AAA[nM]	mean (ΔmA)	SD (mA)	N	mean (ΔmA)	SD (mA)	N	mean (ΔmA)	SD (mA)	N	mean (ΔmA)	SD (mA)	N
0	0	1	3	0	1	3	0	0.3	3	0	1	3
3.90625	6.3	1.3	3	6.9	1.2	3	3.7	1.4	3	3.4	0.6	3
7.8125	12.1	2.5	3	12.9	0.7	3	6.1	1	3	4.8	1.3	3
15.625	20.6	3.3	3	23.2	1.8	3	11.7	1.9	3	9	2.1	3
31.25	34.8	2.4	3	42.6	1.7	3	22.8	0.7	3	17.4	0.7	3
62.5	55.5	2.3	3	64.9	2.7	3	39.6	1.4	3	36.1	2.6	3
125	77.5	3.3	3	95.8	2	3	68.7	2.1	3	65.4	1.1	3
250	96.9	2.1	3	116.8	1.1	3	115.7	1.9	3	112.3	1	3
500	117.4	1.6	3	129.5	0.6	3	139.3	7.4	3	143.1	0.9	3
1000	132.9	0.7	3	136.8	2.4	3	159.6	2.8	3	158.4	1.7	3
2000	141.2	1.6	3	134.2	9.4	3	163.7	3.5	3	165.5	3.1	3
4000	138.9	7.4	3	137.6	5.7	3	168.9	1.5	3	166.2	0.8	3
H2TH-EEE[nM]	mean (ΔmA)	SD (mA)	N	mean (ΔmA)	SD (mA)	N	mean (ΔmA)	SD (mA)	N	mean (ΔmA)	SD (mA)	N
0	0	1.4	3	0	1.4	3	0	0.5	3	0	1.4	3
3.90625	2.1	1.2	3	1.2	0.4	3	1.6	0.4	3	1	0.6	3
7.8125	5.5	1.5	3	5.7	1.3	3	3.7	0.2	3	3.1	0.1	3
15.625	12.6	2.3	3	16.6	0.4	3	6.8	0.8	3	6.8	2	3
31.25	33.9	1.3	3	45.4	4.3	3	17	0.7	3	17	1.6	3
62.5	68.1	2.8	3	90.8	1.1	3	37.8	3.5	3	42.2	4.1	3
125	104.6	2.8	3	110.8	0.8	3	97.4	1.5	3	98.6	0.9	3
250	133.6	3.6	3	118.4	1.9	3	133.4	1.9	3	129.3	4.5	3
500	152.9	2.1	3	123.8	4	3	149.9	1.6	3	141.4	3.3	3
1000	165.8	2.2	3	132.2	1	3	160.4	1.9	3	152.9	0.9	3
2000	172.2	2.2	3	137.6	1.3	3	162	9	3	158.7	0.3	3
4000	174.1	2.4	3	142	1.1	3	170.1	1.6	3	163.7	0.8	3
Figure 5B
KGRR-AAA
	2.9 kb supercoiled plasmid DNA			sheared salmon sperm DNA
M basepairs DNA	mean (ΔmA)	SD (mA)	N	mean (ΔmA)	SD (mA)	N
0	54.9	0.7	3	50.1	3.6	3
0.104	53.4	0.8	3	54.1	2.6	3
0.208	51.9	1.2	3	53.6	3.2	3
0.416	49.7	1.4	3	53.3	2.7	3
0.832	41.7	1.1	3	52.5	1.9	3
1.664	31.7	1.5	3	49.3	1.8	3
3.328	17.6	2.7	3	46	0.4	3
6.656	11.6	0.6	3	38.4	1.5	3
13.312	8.5	1	3	31.1	1.2	3
26.624	6.8	0.6	3	21	1.2	3
53.248	4.9	0.6	3	15.2	0.3	3
106.496	2.7	0.9	3	9.9	0.3	3
KGRR-EEE
	2.9 kb supercoiled DNA			sheared salmon sperm DNA
M basepairs DNA	mean (ΔmA)	SD (mA)	N	mean (ΔmA)	SD (mA)	N
0	56.8	1.9	3	55.3	1.1	3
0.104	56.1	1.9	3	57.2	0.6	3
0.208	55	2.4	3	56.5	0.9	3
0.416	52.7	2.5	3	54.6	0.2	3
0.832	49.4	2.2	3	53.8	0.5	3
1.664	41.3	3.2	3	50	1.2	3
3.328	31.7	1.1	3	45.7	0.8	3
6.656	18.8	1.9	3	41.5	0.0286	3
13.312	10.1	0.5	3	35.1	1.4	3
26.624	5.9	1.6	3	27	0.7	3
53.248	3.4	0.6	3	18.4	1.3	3
106.496	1.8	1.7	3	9.7	0.7	3
H2TH-AAA
	2.9 kb supercoiled DNA			sheared salmon sperm DNA
M basepairs DNA	mean (ΔmA)	SD (mA)	N	mean (ΔmA)	SD (mA)	N
0	45.5	3.8	3	44.5	1.1	3
0.104	44.6	4.3	3	47.1	0.6	3
0.208	44.4	3.9	3	47	1.4	3
0.416	41.3	4	3	45.8	0.9	3
0.832	35.3	2.7	3	43.7	0.8	3
1.664	25.2	4	3	40.6	0.1	3
3.328	11.6	3.3	3	36.4	0.7	3
6.656	4.4	0.9	3	26	1.6	3
13.312	3	0.9	3	16.2	0.6	3
26.624	2.5	1.3	3	8.3	0.5	3
53.248	-0.3	3.4	3	4.1	1.6	3
106.496	0.2	0.5	3	3.3	0.5	3
H2TH-EEE
	2.9 kb supercoiled DNA			sheared salmon sperm DNA
M basepairs DNA	mean (ΔmA)	SD (mA)	N	mean (ΔmA)	SD (mA)	N
0	65.3	1.2	3	61.5	3.7	3
0.104	66.3	1.8	3	64.6	4.6	3
0.208	63.9	0.8	3	65.2	1.8	3
0.416	61.4	0.9	3	63.1	1.8	3
0.832	57.4	0.2	3	60.3	1.1	3
1.664	50.7	1.2	3	54.4	1.2	3
3.328	40	0.6	3	49.4	0.7	3
6.656	19.2	1.1	3	38.9	0.9	3
13.312	7.5	1.1	3	24.6	2.1	3
26.624	5.4	1.1	3	15.1	2.1	3
53.248	3.9	0.5	3	8.7	1.7	3
106.496	0.6	0.4	3	4.3	0.7	3
Figure 5-Figure Supplement 2
H2TH-AAA
	60 bp duplex			70 bp duplex
M basepairs DNA	mean (ΔmA)	SD (mA)	N	mean (ΔmA)	SD (mA)	N
0	55.9	1.9	3	57.9	2.5	3
0.104	59.9	2.2	3	59.4	2.3	3
0.208	55.6	2.6	3	58.3	0.5	3
0.416	56.4	0.8	3	55.9	1.2	3
0.832	56.7	0.4	3	52.7	1.3	3
1.664	51.9	2.1	3	48.8	1.4	3
3.328	38.2	1.7	3	41.2	1.8	3
6.656	25.8	0.7	3	31.1	1.6	3
13.312	15.1	1.7	3	23.7	2.2	3
26.624	8.8	0.6	3	18	2.3	3
53.248	4.7	1.1	3	13.3	2.9	3
106.496	1.1	1.5	3	10.3	1.7	3
H2TH-EEE
	60 bp duplex			70 bp duplex
M basepairs DNA	mean (ΔmA)	SD (mA)	N	mean (ΔmA)	SD (mA)	N
0	59.6	2.2	3	53.6	2.5	3
0.104	58.8	1.1	3	54	2.4	3
0.208	58.5	1.1	3	51.9	1.7	3
0.416	56.6	0.4	3	51.2	1.5	3
0.832	52.1	2.4	3	47.5	1.6	3
1.664	49.3	1.6	3	44.2	1.4	3
3.328	39.5	0.6	3	37.1	2.4	3
6.656	26	1.8	3	29.3	2.5	3
13.312	16	1.7	3	21.7	2.2	3
26.624	8.5	0.8	3	17.1	3.1	3
53.248	4.6	1.5	3	12.4	1.9	3
106.496	-0.1	0.8	3	8.7	2.9	3
