# Supplementary material for: Topoisomerase VI senses and exploits both DNA crossings and bends to facilitate strand passage
Source: eLife journal article supplement (doi:10.7554/elife.31724), 2018-03-29
Supplement: supp [file elife-31724-supp-v1.zip › elife_poa_e31724_Figure_6_source_data_1.docx]

### Figure 6—Source Data 1. Affinities of wildtype, H2THand KGRR mutants for stacked junction DNA.

| Substrate | Enzyme construct | | | | |
| --- | --- | --- | --- | --- | --- |
|  | wildtype | KGRRAAA | KGRREEE | H2THAAA | H2THEEE | |
| 20 bp duplex, Kd,app (nM) | 427±16 | 338 ±11 | 338±15 | 505±22 | 222±11 | |
| 16 x 20 bp junction, Kd,app (nM) | 122±4 | 758 ±28* | 1455±52* | 181±8 | 90±4 | |

*Kd,app ambiguous due to poorly defined ΔFAmax.

**Standard errors in fit parameters are reported.
