# Supplementary material for: Topoisomerase VI senses and exploits both DNA crossings and bends to facilitate strand passage
Source: eLife journal article supplement (doi:10.7554/elife.31724), 2018-03-29
Supplement: supp [file elife-31724-supp-v1.zip › elife_poa_e31724_Figure_6_source_data_2.xlsx]

## Sheet: Sheet1
Numerical Data for Figure 6
Figure 6A
	20 bp duplex			stacked junction
topo VI	mean (ΔmA)	SD (mA)	N	mean (ΔmA)	SD (mA)	N
0	0	0.7	3	0	2	3
3.90625	2.8	0.4	3	4.6	2.6	3
7.8125	4	1.7	3	8.6	2	3
15.625	6.1	1.7	3	16.8	1.8	3
31.25	10.6	0.8	3	29.8	3.6	3
62.5	17.4	2	3	46.1	2.6	3
125	35.5	3	3	72.1	3.1	3
250	64.3	2.8	3	98.8	1.9	3
500	102.4	2.4	3	123.1	1.6	3
1000	127.8	1.3	3	137	2.3	3
2000	150.3	1.3	3	142.4	1.2	3
4000	160.3	2.9	3	144.7	1.1	3
	20 bp duplex			stacked junction
KGRR-AAA	mean (ΔmA)	SD (mA)	N	mean (ΔmA)	SD (mA)	N
0	0	1.1	3	0	1.2	3
3.90625	3.8	1.4	3	4.3	1.3	3
7.8125	5.4	2.4	3	4.2	1.1	3
15.625	8.2	1.3	3	5.9	1.8	3
31.25	13.1	1.6	3	8.1	1.8	3
62.5	23.1	2.2	3	12.8	2	3
125	42.2	3.2	3	22.6	2.7	3
250	68.3	2.5	3	36.6	4.4	3
500	100.7	2.7	3	59.5	5.8	3
1000	125.4	2.9	3	87.6	2.7	3
2000	145.2	4.1	3	101.9	13.2	3
4000	150.9	1.9	3	127.9	3.7	3
	20 bp duplex			stacked junction
KGRR-EEE	mean (ΔmA)	SD (mA)	N	mean (ΔmA)	SD (mA)	N
0	0	0.5	3	0	0.6	3
3.90625	3.4	1.1	3	1.8	1	3
7.8125	4.3	1.6	3	2.1	0.8	3
15.625	6.1	0.9	3	2.6	1.3	3
31.25	10.2	1.4	3	4	1.5	3
62.5	19.4	1.9	3	5.9	1.8	3
125	36.4	2	3	11.9	2.1	3
250	66.2	2.4	3	19.8	0.5	3
500	98.6	2.4	3	38.4	4.9	3
1000	119.7	2.5	3	64.8	4	3
2000	137	2.1	3	84.6	8	3
4000	141.1	3.5	3	109	4.1	3
	20 bp duplex			stacked junction
H2TH-AAA	mean (ΔmA)	SD (mA)	N	mean (ΔmA)	SD (mA)	N
0	0	0.7	3	0	0.7	3
3.90625	3.1	0.6	3	6.5	1.2	3
7.8125	5.2	0.0437	3	8.6	0.9	3
15.625	5.6	2.2	3	13.7	0.8	3
31.25	11.6	1.7	3	22.7	1.2	3
62.5	22.2	2.6	3	34.4	1.2	3
125	35.9	2.8	3	50.8	1.5	3
250	54.4	2	3	73.4	2.2	3
500	80.6	4.7	3	97.7	5.3	3
1000	109.9	2.8	3	113.3	1.6	3
2000	131.3	4.5	3	122.8	1.7	3
4000	153.1	2.8	3	131.4	1.4	3
	20 bp duplex			stacked junction
H2TH-EEE	mean (ΔmA)	SD (mA)	N	mean (ΔmA)	SD (mA)	N
0	0	0.3	3	0	2	3
3.90625	4	1.2	3	7.3	1.4	3
7.8125	6.2	0.4	3	11.1	1.8	3
15.625	10.7	2.2	3	19.1	2.4	3
31.25	21.7	1.2	3	29.7	1	3
62.5	34.9	0.4	3	43	2.2	3
125	55.5	1.8	3	64.3	2.5	3
250	76	5.7	3	87.8	1.1	3
500	99	8.9	3	107.5	1.5	3
1000	123.3	2.6	3	113.1	1.1	3
2000	138.8	1.7	3	115.4	1.1	3
4000	145.5	1.6	3	116.1	1.9	3
Figure 6B
	topo VI	KGRR-AAA	H2TH-AAA
	supercoiled DNA	supercoiled DNA	supercoiled DNA
time(min)	ratiometric FRET	ratiometric FRET	ratiometric FRET
0	0.527843	0.583152	0.479793
0.5	0.565622	0.588323	0.525656
5	0.619247	0.582402	0.557604
10	0.629016	0.575721	0.566975
15	0.632969	0.568671	0.570942
20	0.634423	0.568398	0.572432
25	0.636166	0.566611	0.573072
30	0.636899	0.563134	0.574246
45	0.639047	0.556383	0.576156
60	0.640715	0.562935	0.577233
75	0.641784	0.557583	0.577807
90	0.642965	0.560961	0.577943
105	0.643437	0.56042	0.578798
120	0.64486	0.557534	0.580918
