# Supplementary material for: Topoisomerase VI senses and exploits both DNA crossings and bends to facilitate strand passage
Source: eLife journal article supplement (doi:10.7554/elife.31724), 2018-03-29
Supplement: supp [file elife-31724-supp-v1.zip › elife_poa_e31724_Figure_7_source_data_1.xlsx]

## Sheet: Sheet1
Numerical Data for Figure 7 and Supplement
Figure 7D
	DNA alone	topo VI	BL-AAA	WKxY-AAA	H2TH-AAA	BL-EEE	WKxY-EEE	H2TH-EEE
time(min)	ratiometric FRET	ratiometric FRET	ratiometric FRET	ratiometric FRET	ratiometric FRET	ratiometric FRET	ratiometric FRET	ratiometric FRET
0	0.297105	0.333517	0.364068	0.313121	0.313968	0.330074	0.316408	0.315566
0.5	0.297967	0.387434	0.377773	0.315957	0.309586	0.362108	0.312185	0.3137
5	0.2986	0.389562	0.389968	0.331354	0.307975	0.381068	0.315475	0.311837
10	0.299	0.391223	0.391571	0.338461	0.306607	0.385151	0.317985	0.311898
15	0.298972	0.391105	0.391023	0.345442	0.3076	0.385402	0.319557	0.310243
20	0.30048	0.390006	0.389083	0.351222	0.306053	0.388586	0.320207	0.309656
25	0.297083	0.391038	0.388792	0.353626	0.307088	0.38691	0.321963	0.308769
30	0.301093	0.391977	0.386969	0.357493	0.308208	0.387572	0.32375	0.308692
45	0.301194	0.393003	0.384434	0.364454	0.306958	0.389477	0.328197	0.306726
60	0.301451	0.392713	0.38553	0.370104	0.306989	0.391392	0.33244	0.305913
75	0.30215	0.392955	0.384255	0.371767	0.307535	0.386649	0.336713	0.305235
90	0.301973	0.39794	0.38262	0.376796	0.308238	0.391704	0.338361	0.30532
105	0.301611	0.39229	0.379989	0.370844	0.308798	0.393455	0.340475	0.304459
120	0.302566	0.39209	0.384261	0.378366	0.308606	0.390313	0.344294	0.303339
Figure 7-Supplement 1
	Cy5, Cy5.5 on same 70 bp duplex (cis)	Cy5, Cy5.5 on separate 70 bp duplexes (trans)
time(min)	ratiometric FRET	ratiometric FRET
0	0.333517	0.296004
0.5	0.387434	0.297801
5	0.389562	0.296654
10	0.391223	0.292905
15	0.391105	0.291491
20	0.390006	0.292213
25	0.391038	0.289866
30	0.391977	0.291996
45	0.393003	0.292742
60	0.392713	0.290012
Figure 7-Supplement 2
	500:1 basepairs supercoiled DNA:KGRRAAA	500:1 basepairs 70bp duplex:KGRRAAA
time(min)	ratiometric FRET	ratiometric FRET
0	0.583152	0.492552
0.5	0.588323	0.511879
5	0.582402	0.52595
10	0.575721	0.529953
15	0.568671	0.527553
20	0.568398	0.530905
25	0.566611	0.53177
30	0.563134	0.531094
45	0.556383	0.524099
60	0.562935	0.525503
75	0.557583	0.525916
