# Supplementary figures and images for: Topoisomerase VI senses and exploits both DNA crossings and bends to facilitate strand passage
Source: eLife journal article supplement (doi:10.7554/elife.31724), 2018-03-29

# Figure 8-Figure Supplement 1

A

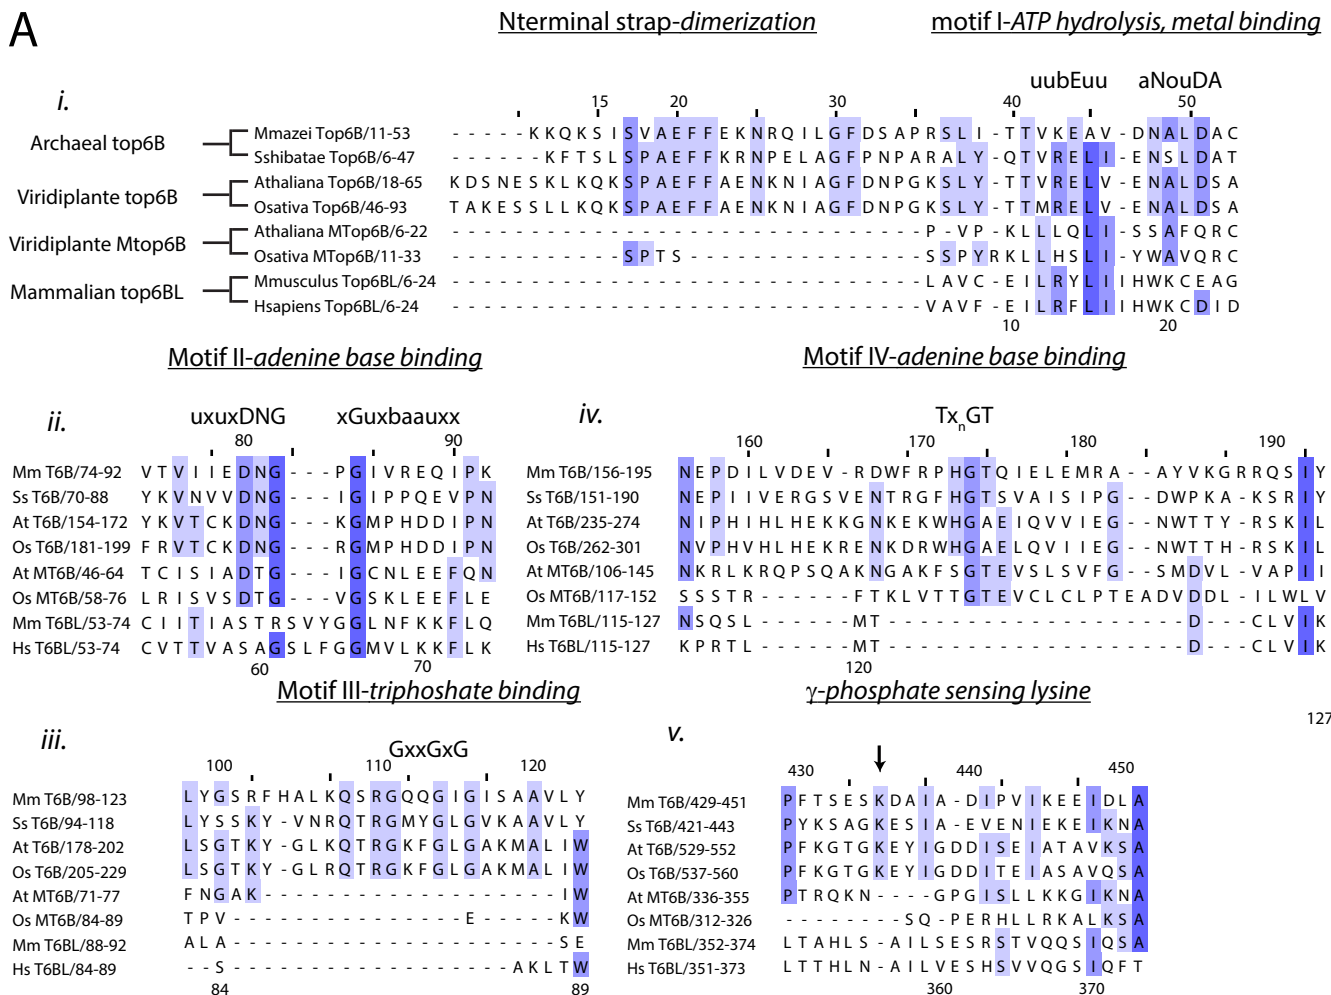

127

B

● = conserved ● = not conserved

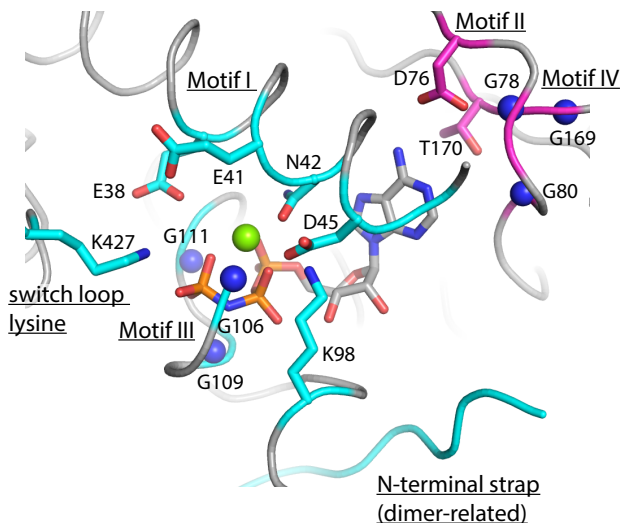

Supplement: supp [file elife-31724-supp-v1.zip › elife_poa_e31724_Figure_8_figure_supplement_1.pdf]

Figure 4-Figure Supplement 1

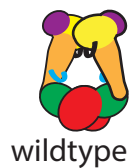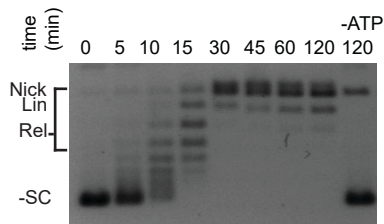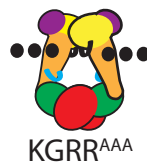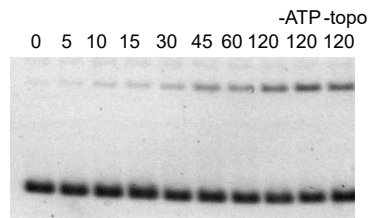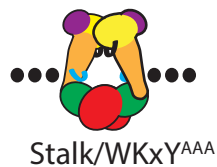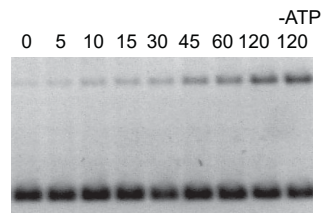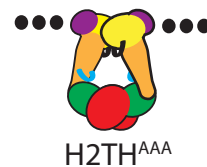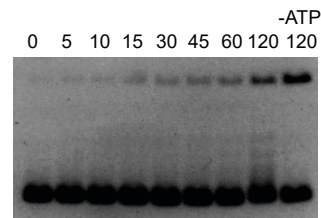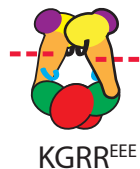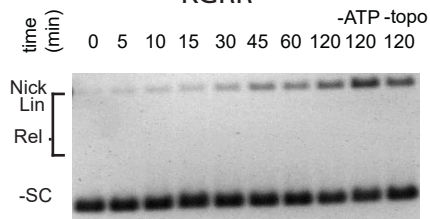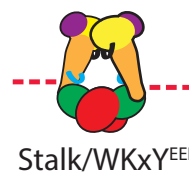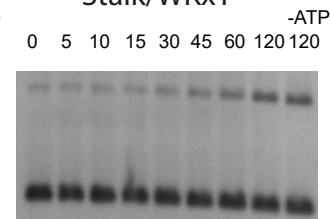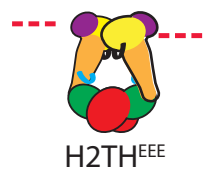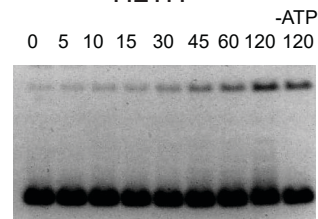

Supplement: supp [file elife-31724-supp-v1.zip › elife_poa_e31724_Figure_4_figure_supplement_1.pdf]
